# Supplementary material for: Effect of Porosity and Surface Chemistry on CO2 and CH4 Adsorption in S-Doped and S-/O-co-Doped Porous Carbons
Source: MDPI journal article supplement (doi:10.3390/c8030041), 2022-08-15
Supplement: s1 [file s1]

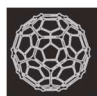

# Effect of Porosity and Surface Chemistry on CO<sub>2</sub> and CH<sub>4</sub> Adsorption in S-Doped and S-/O-co-Doped Porous Carbons

Snezana Reljic, Manuel Martinez-Escandell and Joaquin Silvestre-Albero \*

Laboratorio de Materiales Avanzados, Departamento de Química Inorgánica, Instituto Universitario de Materiales (IUMA), Universidad de Alicante, 03690 San Vicente del Raspeig, Spain

\* Correspondence: joaquin.silvestre@ua.es

## SUPPORTING INFORMATION

### Content

| Figure     | Caption                                                                                                                               | Page |
|------------|---------------------------------------------------------------------------------------------------------------------------------------|------|
| Figure S1  | Deconvoluted XPS spectra in the (a) C1s, (b) O1s, (c) N1s and (d) S2p region for the samples PPAC-800 (up) and PPAC-P-800 (down)      | S2   |
| Figures S2 | Correlation between the narrow micropore volume ( $V_n$ ) and the excess amount adsorbed for CH <sub>4</sub> at atmospheric pressure  | S3   |
| Figure S3  | Correlation between the narrow micropore volume ( $V_n$ ) and the excess amount adsorbed for CO <sub>2</sub> at atmospheric pressure. | S3   |

## Sample PPAC1:3800

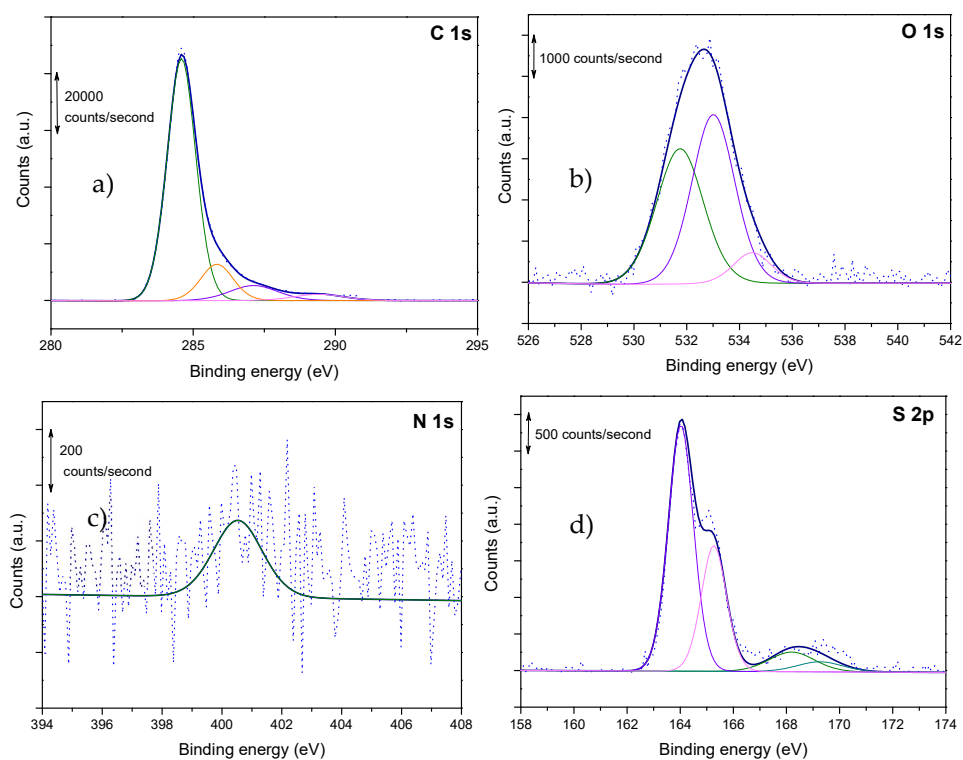

## Sample PPAC1:3P800

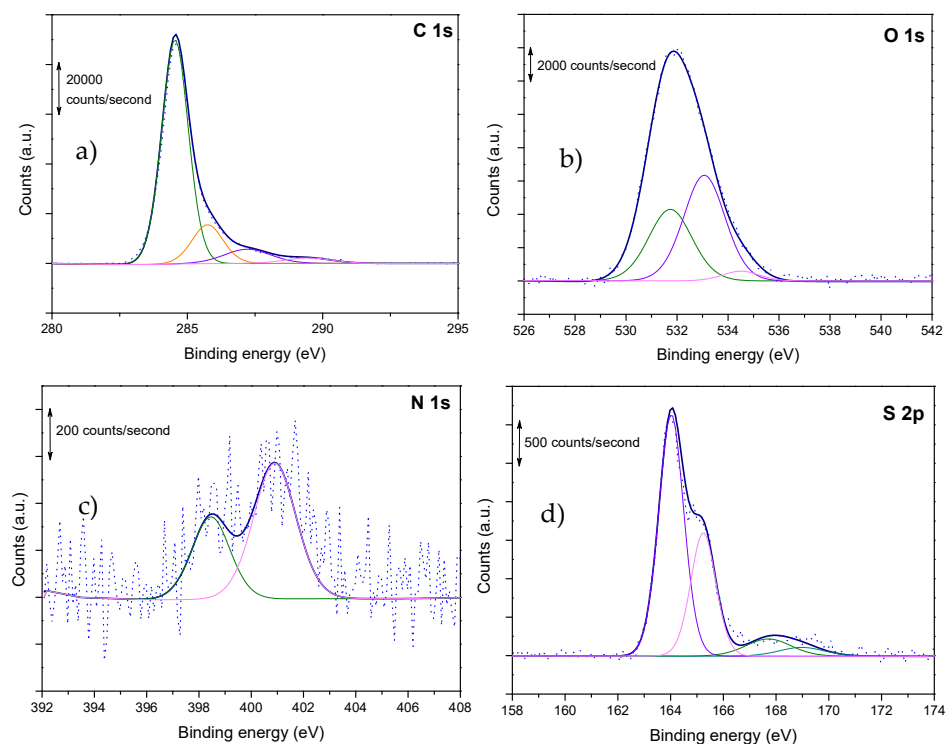

**Figure S1.** Deconvoluted XPS spectra in the (a) C1s, (b) O1s, (c) N1s and (d) S2p region for the samples PPAC1:3800 (up) and PPAC1:3P800 (down).

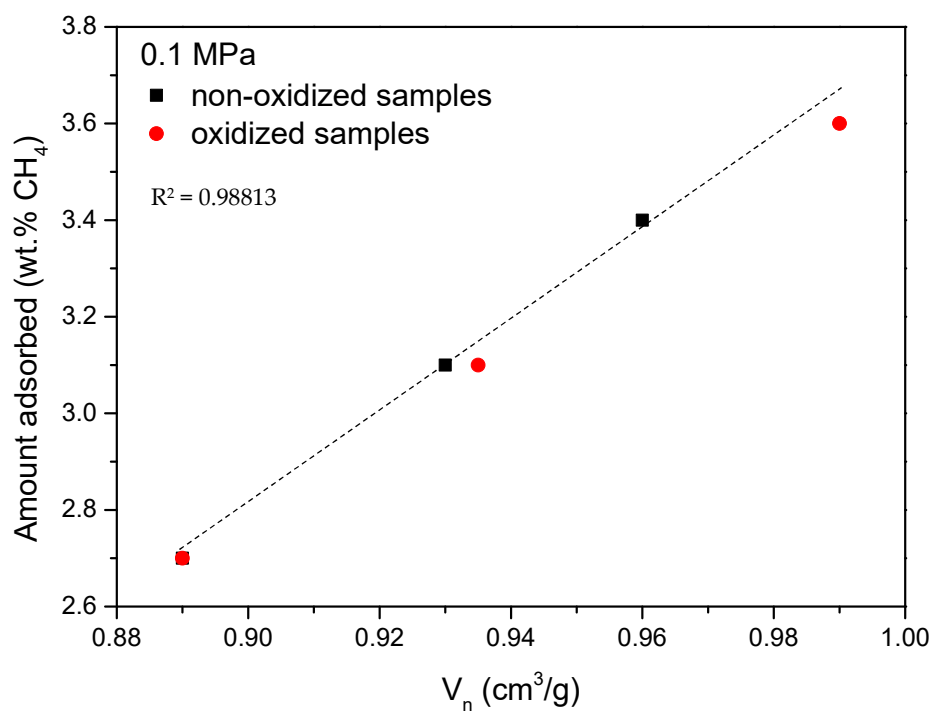

**Figure S2.** Correlation between the narrow micropore volume ( $V_n$ ) and the excess amount adsorbed for CH<sub>4</sub> at atmospheric pressure.

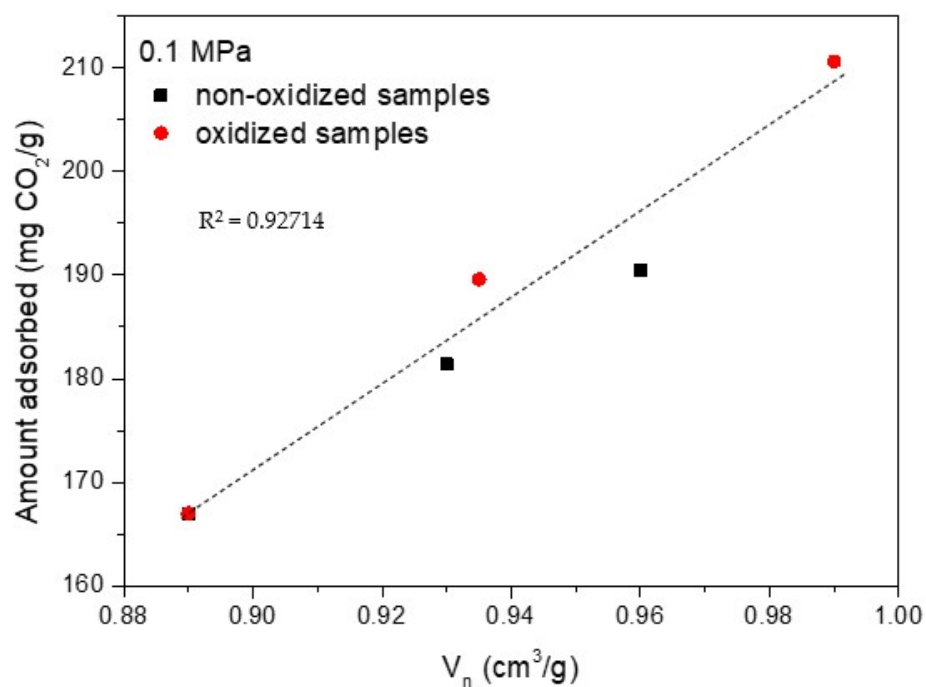

**Figure S3.** Correlation between the narrow micropore volume ( $V_n$ ) and the excess amount adsorbed for CO<sub>2</sub> at atmospheric pressure.
